# Supplementary material for: Retinal Organoids from an AIPL1 CRISPR/Cas9 Knockout Cell Line Successfully Recapitulate the Molecular Features of LCA4 Disease
Source: MDPI journal article supplement (doi:10.3390/ijms24065912), 2023-03-21
Supplement: s1 [file s1]

Supplementary information: Supplementary Figures:

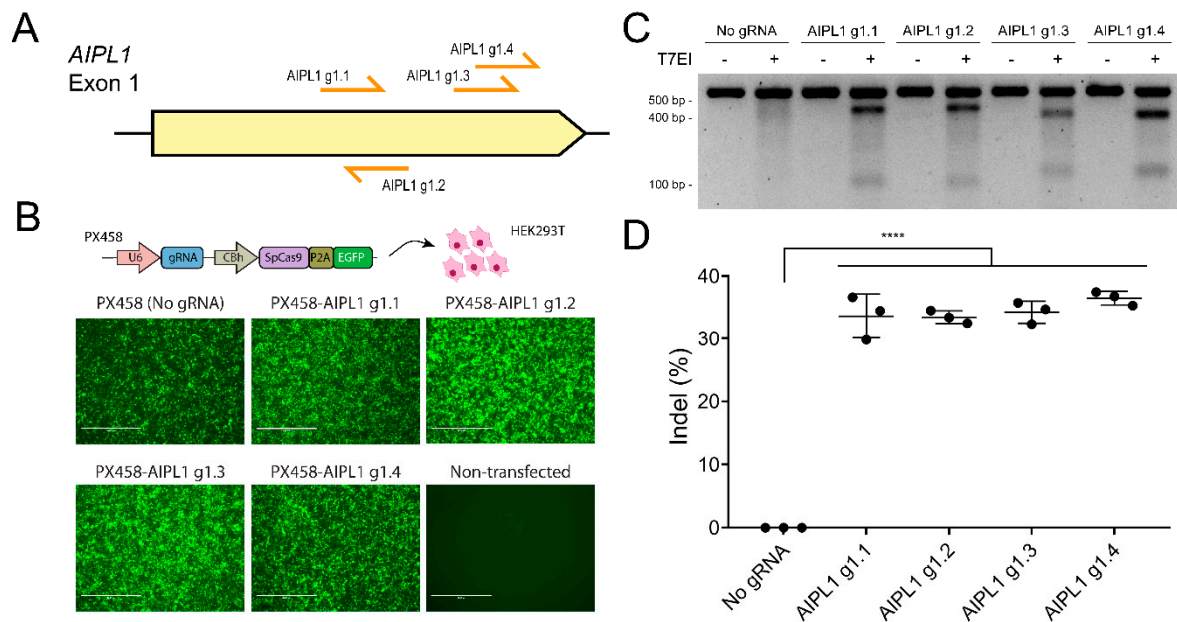

**Figure S1:** Design of CRISPR/Cas9 sequences for targeted *AIPL1* gene knockout. **(A)** Schematic illustration of guide RNAs (gRNA) designed to direct the CRISPR/Cas9 endonuclease to *AIPL1* exon 1. **(B) (Top)** Schematic illustration of CRISPR/Cas9-encoding vector PX458 for transfection into human embryonic kidney 293T (HEK293T) cells. Targeting gRNA is driven by the U6 promoter, while *Streptococcus pyogenes* Cas9 nuclease (SpCas9) and a EGFP reporter separated by a T2A cleavage peptide are driven by the CBh promoter. **(Bottom)** Fluorescence GFP imaging of transfected HEK293T cells show high levels of PX458 transfection similar across all transfected constructs. Scale bar, 1000  $\mu$ m. **(C)** Analysis of CRISPR/Cas9-mediated targeted indel formation by T7 Endonuclease I (T7EI) assay. Fragmented bands of a lower molecular weight result from the indel formation and demonstrates that cells transfected with *AIPL1*-targeting PX458 constructs (AIPL1 g1.1-4) were able to promote double-strand breaks in their respective target sequences. **(D)** Quantification of indel formation by densitometric analysis of T7EI assay indicates a level of 30-35% cutting efficiency across all targeting *AIPL1* gRNAs. Data expressed as Mean  $\pm$  SD (N=3). \*\*\*\*  $p < 0.0001$ , Student's t test.

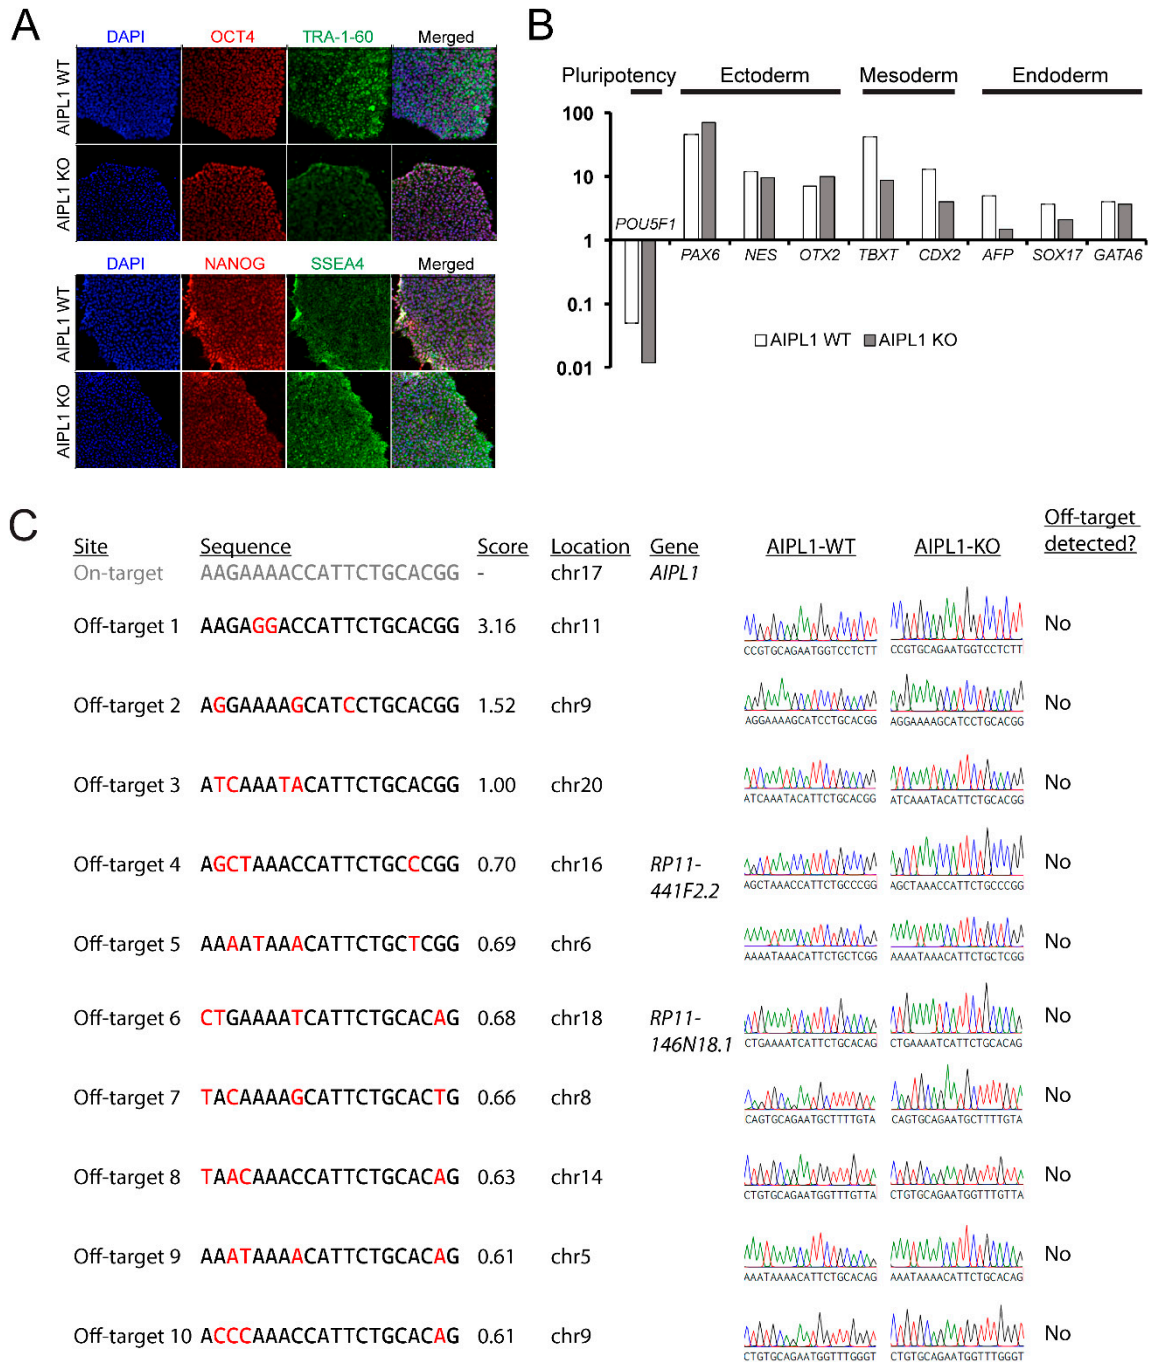

**Figure S2:** Characterization of AIPL1 isogenic iPSC clones. **(A)** Immunocytochemistry analysis of pluripotency markers Oct4, Tra-1-60, Nanog and SSEA4 markers in AIPL1-WT and AIPL1-KO isogenic iPSC lines. Scale bar = 10  $\mu$ m. **(B)** Trilineage differentiation potential of AIPL1-WT and AIPL1-KO isogenic iPSC lines into ectoderm, endoderm and mesoderm germ layers was confirmed using gene markers of differentiation. **(C)** Sanger sequencing analysis of CRISPR/Cas9 off-target mutations in AIPL1-WT and AIPL1-KO isogenic iPSC lines. Top 10 off-target sequences predicted *in silico* with highest homology to AIPL1 g1.4 (On-target) are illustrated, along with predicted off-target score, chromosomal location and targeted gene. Mismatches to the on-target sequences are highlighted in red.

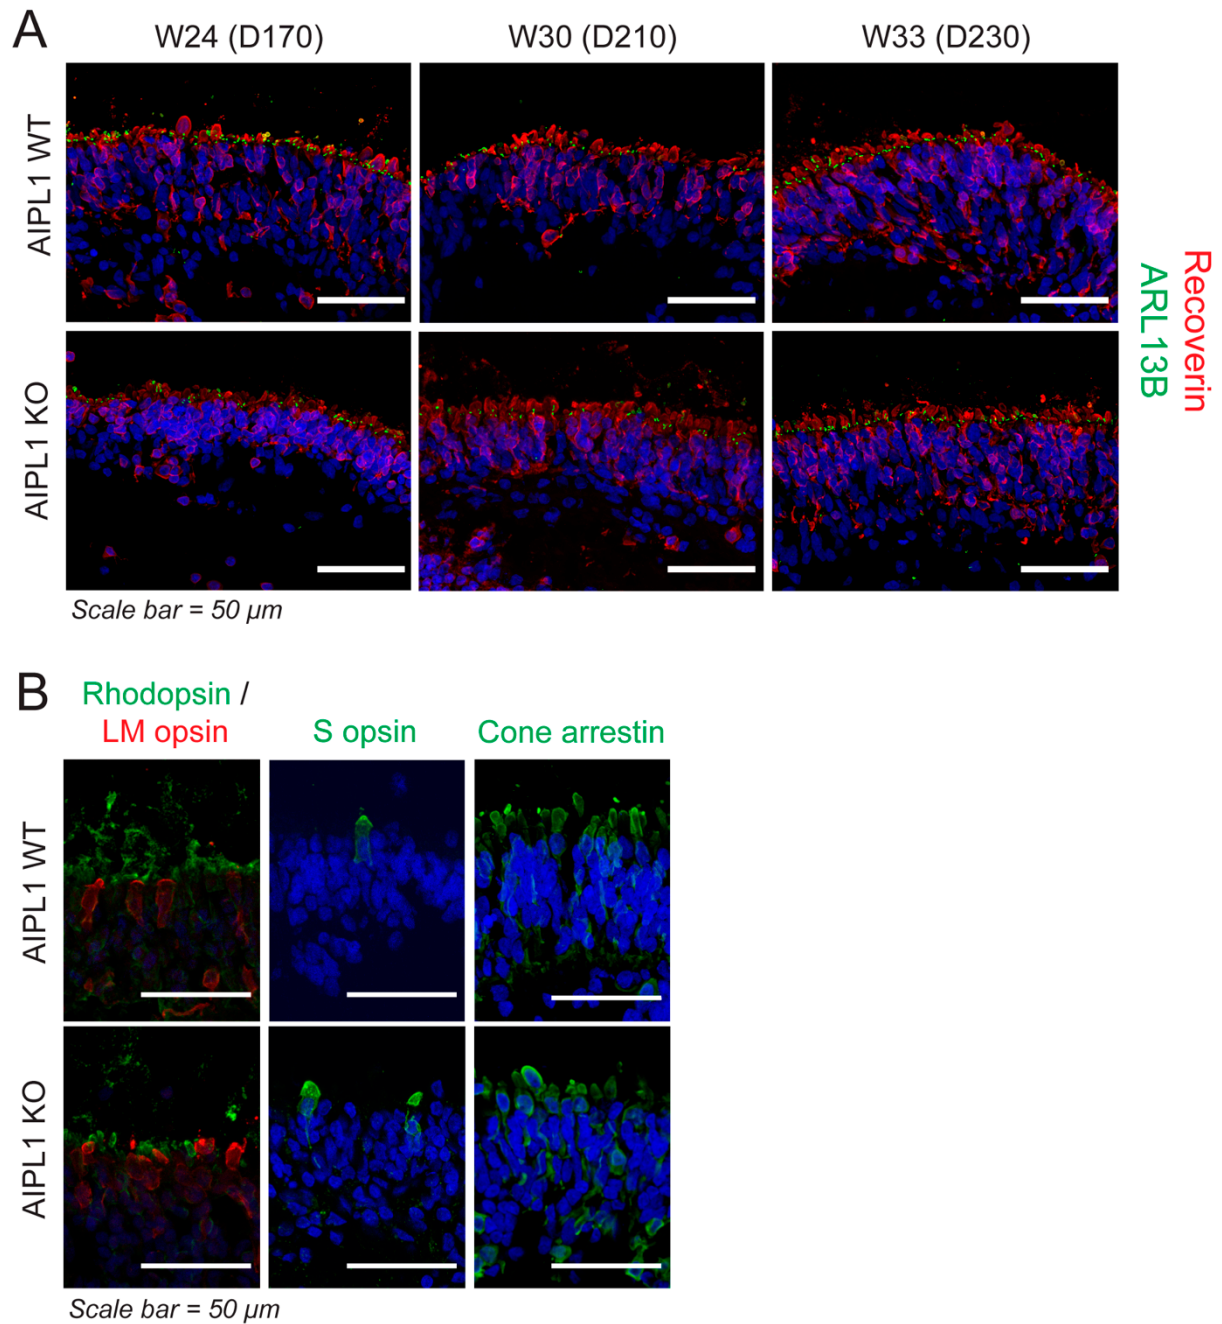

**Figure S3:** Immunocytochemistry staining of additional photoreceptor markers in AIPL1 isogenic retinal organoids. **(A)** The photoreceptor marker recoverin (red) and photoreceptor cilia marker ARL13B (green) were investigated in AIPL1-WT and AIPL1-KO retinal organoids at day (D) 170, D210 and D230. Ubiquitous distribution of recoverin was observed in the outer nuclear layer while ARL13B was detected in photoreceptor cilia, both as expected. **(B)** Rod (rhodopsin) and cone (LM opsin, S opsin and cone arrestin) markers were investigated in D230 AIPL1-WT and AIPL1-KO retinal organoids. Consistent abundance of rods (rhodopsin), cones (cone arrestin), as well as red/green cones (LM opsin) and blue cones (S opsin) were detected within the outer nuclear layer of AIPL1-WT and AIPL1-KO retinal organoids. Scale bar = 50  $\mu$ m.

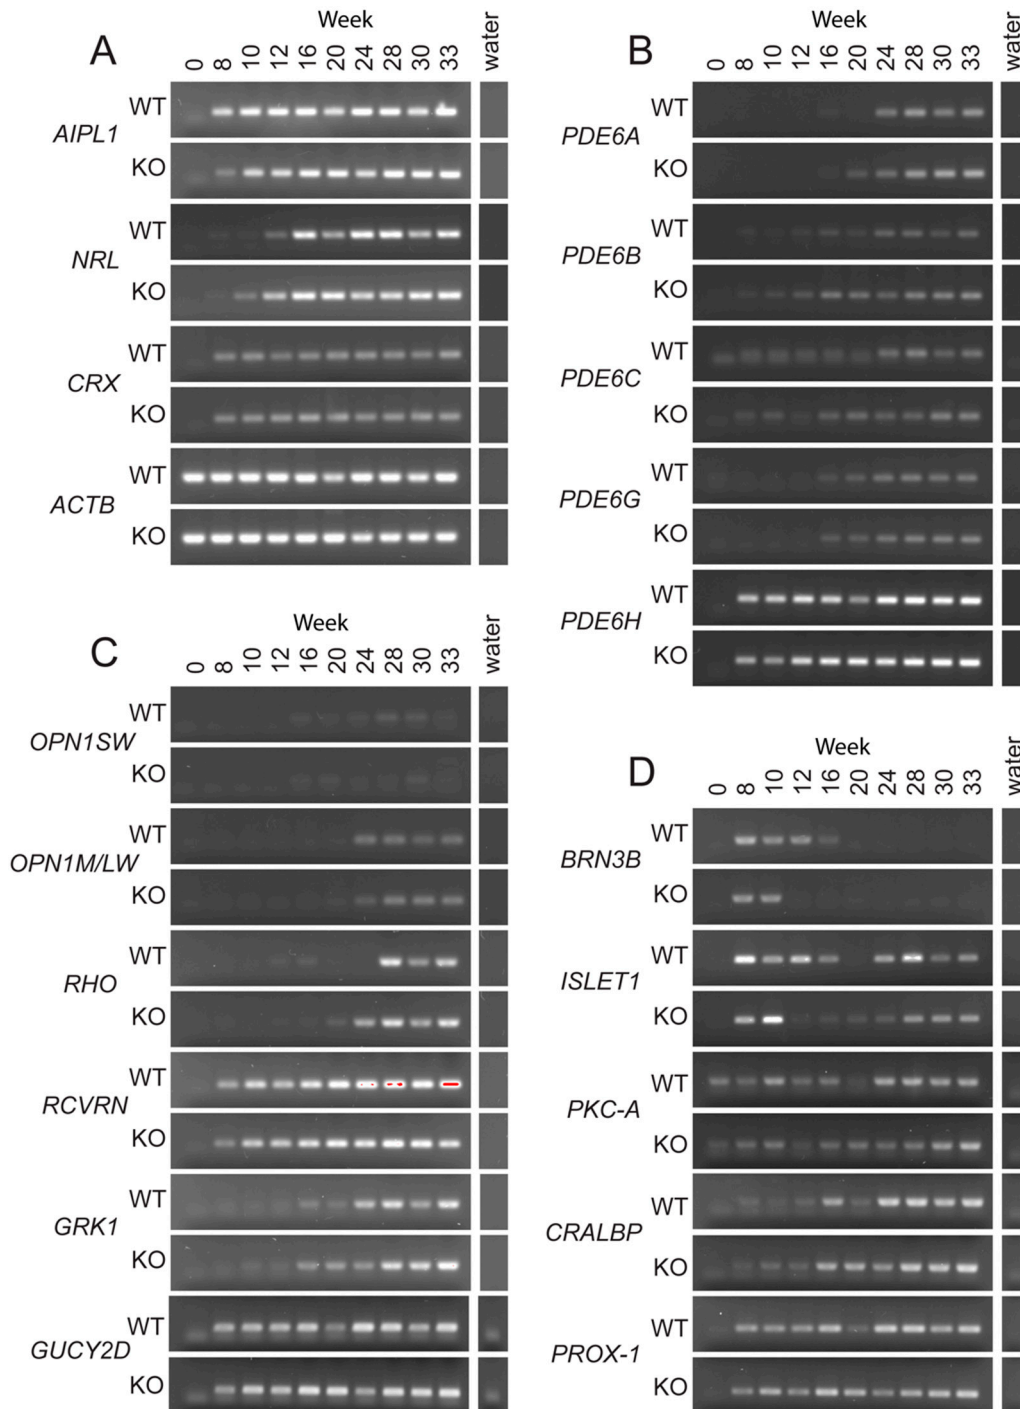

**Figure S4:** Temporal gene expression of relevant retinal markers in AIPL1 isogenic retinal organoids; week 0 = expression in iPSC prior to the start of differentiation. RT-PCR was used to assess the temporal gene expression for a range of markers, specifically **(A)** *AIPL1*, photoreceptor-specific transcription factors (*NRL*, *CRX*) and the  $\beta$ -actin gene (*ACTB*) as a loading control; **(B)** *PDE6* in rod (*PDE6A*, *PDE6B*, *PDE6G*) and cone (*PDE6C*, *PDE6H*) photoreceptors; **(C)** photoreceptor-specific markers in photoreceptors (*RCVRN*, *GRK1*, *GUCY2D*), rods (*RHO*) and cones (*OPN1SW*, *OPN1M/LW*); and **(D)** markers of other non-photoreceptor cell types typically found within the retina (retinal ganglion cells (*BRN3B*, *ISL1*), bipolar cells (*PKC-A*), Müller glia (*CRALBP*) and amacrine and horizontal cells (*PROX1*). The temporal gene expression patterns were similar in AIPL1-WT and AIPL1-KO RO.

## Supplementary Information: Supplementary Tables

**Table S1.** Top AIPL1-targeting guide RNA sequences selected by *in silico* analysis.

| Name       | Sequence (5'-3')      | On-target score <sup>a</sup> | Off-target score <sup>b</sup> |
|------------|-----------------------|------------------------------|-------------------------------|
| AIPL1 g1.1 | TGCCGCTCTGCTCCTGAAC   | 61.1                         | 41.9                          |
| AIPL1 g1.2 | TTCCACGTTTCAGGAGCAGAG | 74.1                         | 37.4                          |
| AIPL1 g1.3 | CAAGAAAACCATTCTGCACG  | 61.6                         | 41.9                          |
| AIPL1 g1.4 | AAGAAAACCATTCTGCACGG  | 71.2                         | 42.5                          |

<sup>a</sup>Predicted by Benchling (<https://www.benchling.com/>). Score illustrated from 0-100 and directly correlated to predicted cutting efficiency.

<sup>b</sup>Predicted by Benchling (<https://www.benchling.com/>). Score illustrated from 0-100 and directly correlated to predicted target specificity.

**Table S2.** Primers for AIPL1 gRNA used for cloning AIPL1 gRNAs and for amplification of AIPL1 exon 1 for T7EI assay.

| Name           | Sequence (5'-3')           |
|----------------|----------------------------|
| AIPL1 g1.1-F   | caccgTGCCGCTCTGCTCCTGAACG  |
| AIPL1 g1.1-R   | aaacCGTTCAGGAGCAGAGCGGCAc  |
| AIPL1 g1.2-F   | caccgTTCCACGTTTCAGGAGCAGAG |
| AIPL1 g1.2-R   | aaacCTCTGCTCCTGAACGTGGAAc  |
| AIPL1 g1.3-F   | caccgCAAGAAAACCATTCTGCACG  |
| AIPL1 g1.3-R   | aaacCGTGCAGAATGGTTTTCTTGc  |
| AIPL1 g1.4-F   | caccgAAGAAAACCATTCTGCACGG  |
| AIPL1 g1.4-R   | aaacCCGTGCAGAATGGTTTTCTTc  |
| AIPL1 Exon1-F  | GCTGGGTAAATCCCAGAGTCTCAGC  |
| AIPL1 Exon1-2R | AAAGCCCGAATTCTGTAGCCACAGA  |

**Table S3.** Primary and secondary antibodies used in immunofluorescence (IF) and western blot (WB) analysis.

| Antibody             | Species | Fluorophore conjugate | Supplier                      | Cat number | Dilution                   |
|----------------------|---------|-----------------------|-------------------------------|------------|----------------------------|
| AIPL1                | Rabbit  | -                     | Produced in-house             | N/A        | 1:250 (IF)                 |
| AIPL1                | Rabbit  | -                     | V. Ramamurthy lab             | N/A        | 1:1000 (WB)                |
| ARL13b               | Mouse   | -                     | Neuromab                      | 75-287     | 1:1000 (IF)                |
| Cone arrestin        | Mouse   | -                     | Millipore                     | MABN2636   | 1:250 (IF)                 |
| GAPDH                | Mouse   | -                     | ProteinTech                   | 60004-1-Ig | 1:10,000 (WB)              |
| L/M Opsin            | Rabbit  | -                     | Millipore                     | AB5405     | 1:500 (IF)                 |
| NANOG                | Rabbit  | -                     | Abcam                         | AB21624    | 1:200 (IF)                 |
| OCT4                 | Rabbit  | -                     | Abcam                         | AB19857    | 1:1000 (IF)                |
| PDE6A                | Rabbit  | -                     | ProteinTech                   | 21200-1-AP | 1:1000 (IF)<br>1:3000 (WB) |
| PDE6B                | Rabbit  | -                     | Thermo Fisher Scientific      | PA1-722    | 1:500 (IF)                 |
| Rhodopsin            | Mouse   | -                     | Millipore                     | MABN15     | 1:1000 (IF)                |
| Recoverin            | Rabbit  | -                     | Abcam                         | Ab5585     | 1:1000 (IF + WB)           |
| S Opsin              | Rabbit  | -                     | Millipore                     | AB5407     | 1:200 (IF)                 |
| SSEA4                | Mouse   | -                     | Cell Signalling               | MC813      | 1:300 (IF)                 |
| TRA-1-60             | Mouse   | -                     | Cell Signalling               | 4746       | 1:500 (IF)                 |
| $\alpha$ -mouse IgG  | Donkey  | AF488                 | Thermo Fisher Scientific      | A-21202    | 1:1000 (IF)                |
| $\alpha$ -mouse IgG  | Donkey  | AF555                 | Thermo Fisher Scientific      | A-32773    | 1:1000 (IF)                |
| $\alpha$ -mouse IgG  | Donkey  | AF647                 | Thermo Fisher Scientific      | A-31571    | 1:1000 (IF)                |
| $\alpha$ -rabbit IgG | Donkey  | AF488                 | Thermo Fisher Scientific      | A-21206    | 1:1000 (IF)                |
| $\alpha$ -rabbit IgG | Donkey  | AF555                 | Thermo Fisher Scientific      | A-31572    | 1:1000 (IF)                |
| $\alpha$ -rabbit IgG | Donkey  | AF647                 | Thermo Fisher Scientific      | A-31573    | 1:1000 (IF)                |
| $\alpha$ -mouse IgG  | Goat    | HRP                   | Thermo Fisher Scientific      | 31430      | 1:10,000 (WB)              |
| $\alpha$ -rabbit IgG | Goat    | HRP                   | Thermo Fisher Scientific      | 31461      | 1:10,000 (WB)              |
| Phalloidin           | -       | AF488                 | Invitrogen / Molecular probes | A12379     | 5 U/mL (IF)                |

**Table S4.** Primer sequences for RT-PCR analysis of retinal markers.

| Marker           | Forward                      | Reverse                 | Expected product size (bp) |
|------------------|------------------------------|-------------------------|----------------------------|
| <i>ACTB</i>      | GCGAGAAGATGACCCAGATC         | CCAGTGGTACGGCCAGAGG     | 103                        |
| <i>AIPL1</i>     | ACCGGATCCCGAGTGATCTT         | CGATGATGATGTGCATGGGC    | 66                         |
| <i>BRN3B</i>     | CTCGCTCGAAGCCTACTTTG         | GACGCGCACCACGTTTTTC     | 100                        |
| <i>CRALBP</i>    | AAGCTGGCTACCCTGGTGT          | TGAAGCAATATGCCTGCAAGA   | 126                        |
| <i>CRX</i>       | TTTGCCAAGACCCAGTACC          | GTTCTTGAACCAAACCTGAAC   | 96                         |
| <i>ISLET1</i>    | GCGGAGTGTAATCAGTATTTGGA      | GCATTTGATCCCGTACAACCT   | 102                        |
| <i>NRL</i>       | CACTGACCACATCCTCTCGG         | GAGGGTTCCCGCTTTACCTC    | 141                        |
| <i>OPN1LW/MW</i> | CCTATGTGTGTCCTGGAGG          | CATCCATCTCTCCCAGGAAATG  | 90                         |
| <i>OPN1SW</i>    | CATGTTTGTGCTTTGGAGG          | CGAAGGGCTTACAGATGAC     | 109                        |
| <i>PDE6A</i>     | TAACGTCCCCAACACAGAGG         | CCACCACATCCTTCCCATTC    | 116                        |
| <i>PDE6B</i>     | GACGTGTGGTCTGTGCTGAT         | CTTGCCGTGGAGGATGTAGTC   | 111                        |
| <i>PDE6C</i>     | GTCACTAAGAACCTGCTGGCAAC<br>C | AAAGACCTCTTCATCCTGTTTGG | 117                        |
| <i>PDE6G</i>     | AAGCAGCGACAGACCAGG           | TGTGATGTCTGTTCCCAGGC    | 105                        |
| <i>PDE6H</i>     | GAGGCAGACTCGCCAATTC          | GTGGCTGAATGCCTCCCA      | 130                        |
| <i>PKC-A</i>     | GTCCACAAGAGGTGCCATGAA        | AAGGTGGGGCTTCCGTAAGT    | 122                        |
| <i>PROX-1</i>    | TGAAGACCTACTTCTCCGAC         | GACGTGCGTACTTCTCCATC    | 114                        |
| <i>RCVRN</i>     | ATGAAGTGCTGGAGATCGTC         | ATCTTCTCGGCTCGCTTTTC    | 106                        |
| <i>RETGC</i>     | ACTGTCCCTCTGAAGGCAG          | CGTCATAGATGGTGCCAAAG    | 117                        |
| <i>RHO</i>       | ACCAGCACCTCTACACCTCTC        | AGGACCACAGGGCAATTC      | 109                        |
